# Supplementary material
Source: PubMed Central journal article supplement (PMC2797207)
Supplement: supp_M109.021873_jbc.M109.021873-1.pdf [file supp_M109.021873_jbc.M109.021873-1.pdf]

## SUPPLEMENTAL FIGURES

### BAX ACTIVATES ENDOPHILIN B1 OLIGOMERIZATION AND LIPID MEMBRANE VESICULATION

Tatiana K. Rostovtseva, Hacène Boukari, Antonella Antignani, Brian Shiu, Soojay Banerjee, Albert Neutzner, Richard J. Youle

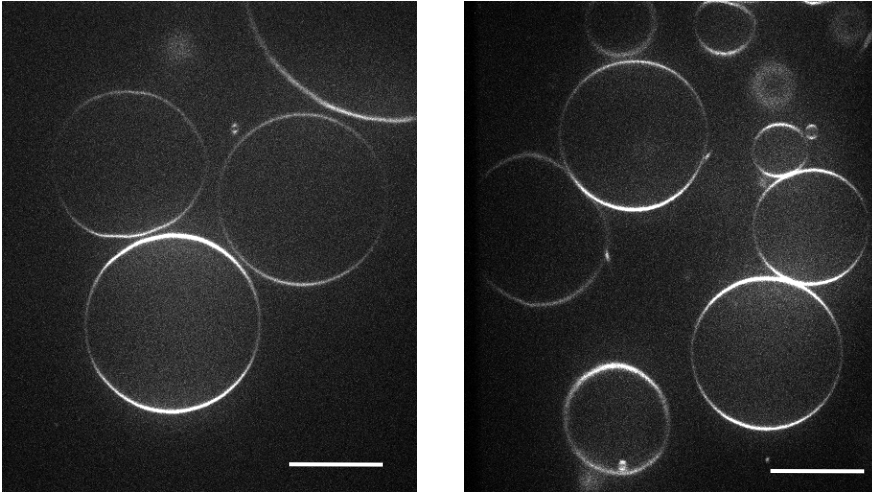

**Supplementary Figure S1.** Equivalent amounts of Tris-HCl buffer do not affect GUV's shape and size. Confocal images were taken after addition of 0.5 mM Tris-HCl at pH 8.0.

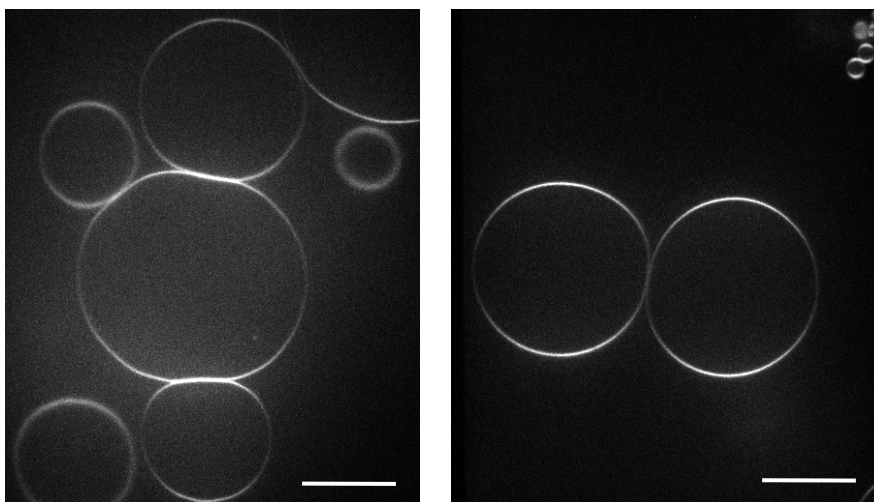

**Supplementary Figure S2.** C-terminus truncated Endo B1, Endo B1 $\Delta$ C, preincubated with Bax, has no effect on liposome vesiculation. Confocal images were taken 30 min after addition of 490 nM of Endo B1 $\Delta$ C + Bax (1:1 mol/mol).

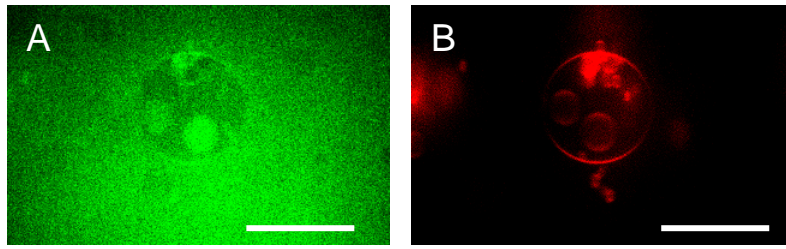

**Supplementary Figure S3.** Images of GUVs generated after addition of Endo B1 labeled with Alexa-488 and preincubated with Bax. (A), Free dye and labeled Endo B1 fill some of the small vesicles (green circles) inside the larger one without luminal dye (dark green circles). Conditions were as in Fig. 5. Image was taken at 488 nm excitation wavelength and shows Alexa-488 and (B), at 568 nm excitation wavelength and shows liposome membranes labeled with Rh-PE (red).
